# Supplementary material for: Changes in Lymphocyte Subpopulations after Remdesivir Therapy for COVID-19: A Brief Report
Source: MDPI journal article supplement (doi:10.3390/ijms241914973), 2023-10-07
Supplement: s1 [file s1]

# **Changes in Lymphocyte Subpopulations after Remdesivir Therapy for COVID-19: A Brief Report**

Rossella Ciani, Maria Grazia Massaro, Elisabetta De Santis, Beatrice Totti, Antonio Gasbarrini, Giovanni Gambassi and Vincenzo Giambra

## **Supplementary Information**

including

Supplementary Figure S1

Supplementary Tables S1-S2

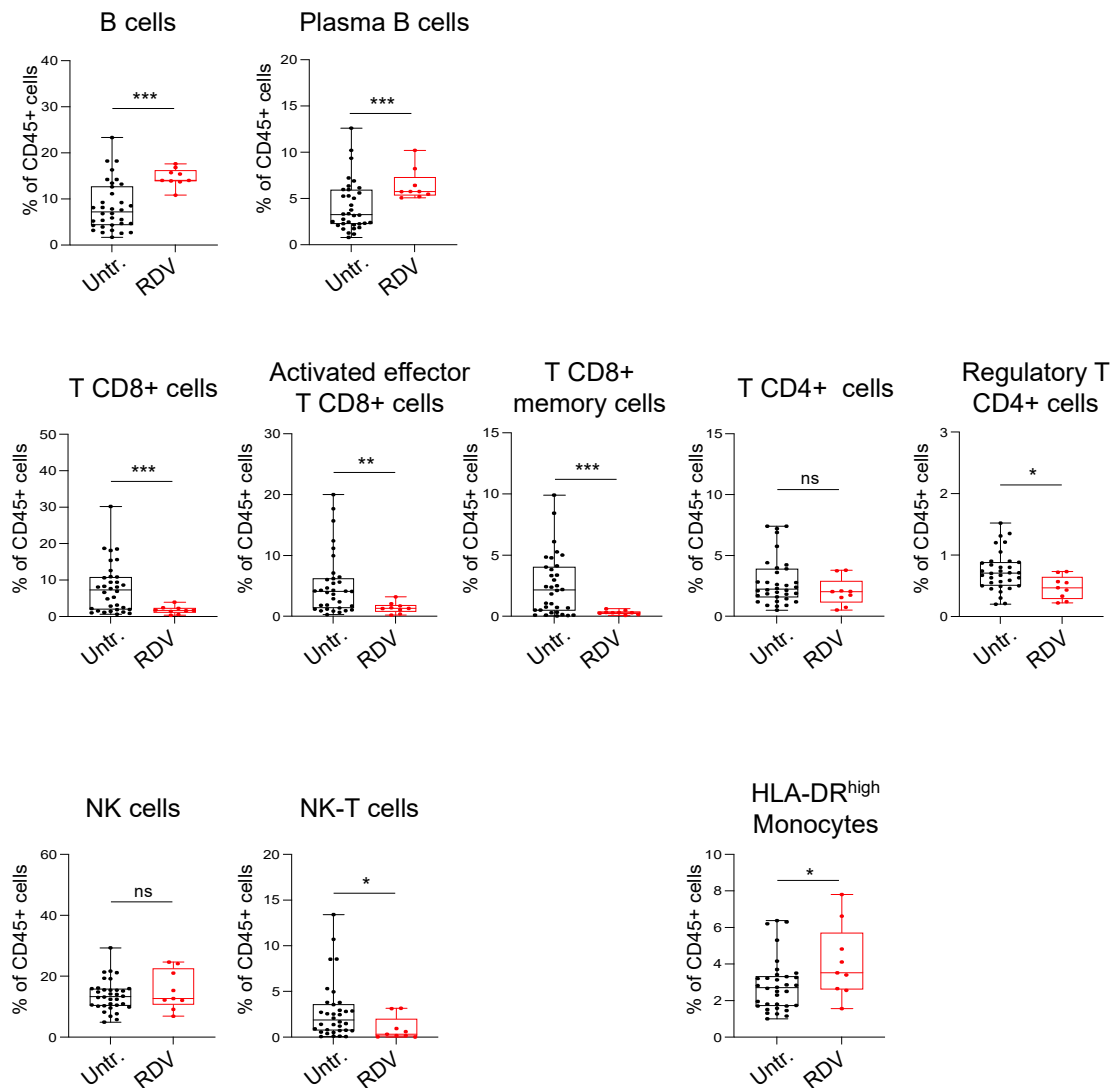

**Supplementary Figure S1 related to Table 1.** Distribution of lymphocyte subpopulations in patients not in therapy (Untr) or after Remdesivir (RDV) treatment. Welch's t-test statistical analysis was performed on the percentage values of the different fractions of CD45+ cells. *ns*, not significant; \*,  $p < 0.05$ ; \*\*,  $p < 0.01$ ; \*\*\*,  $p < 0.001$  (two-tailed unpaired Welch's t-test).

| Laser | Detector | Fluorophore      | Marker      | Antibody Clone  | Company      | Catalog #  |
|-------|----------|------------------|-------------|-----------------|--------------|------------|
| 405   | 448/59   | Super Bright 436 | CD3         | SK7             | eBioscience™ | 62-0036-41 |
|       | 525/50   | eFluor 506       | CD45        | HI30            | eBioscience™ | 69-0459-41 |
|       | 620/29   | Qdot 605         | HLA-DR      | Tü36            | eBioscience™ | Q10052     |
|       | 710/45   | Super Bright 702 | CD127       | eBioRDR5        | eBioscience™ | 67-1278-42 |
|       | 755 LP   | Super Bright 780 | CD8         | 53-6.7          | eBioscience™ | 78-0081-82 |
| 488   | 513/26   | Alexa Fluor 488  | CD19        | SJ25C1          | eBioscience™ | 53-0198-42 |
|       | 795/70   | PE-Cyanine7      | CD16        | eBioCB16 (CB16) | eBioscience™ | 25-0168-42 |
| 561   | 579/16   | PE               | CD4         | RPA-T4          | eBioscience™ | 12-0049-42 |
|       | 614/20   | PE-eFluor 610    | CD56        | CMSSB           | eBioscience™ | 61-0567-42 |
|       | 692/75   | PE-Cyanine5      | CD38        | HIT2            | eBioscience™ | 15-0389-42 |
| 640   | 671/30   | APC              | CD14        | 61D3            | eBioscience™ | 17-0149-41 |
|       | 722/44   | Alexa Fluor 700  | CD11b       | CBRM1/5         | eBioscience™ | 56-0113-42 |
|       | 795/70   | APC-eFluor 780   | Live / Dead |                 | eBioscience™ | L34975     |

**Supplementary Table S1. Panel of cell surface markers and fluorophore-conjugated antibodies used in the multiparameter flow cytometry assessment of PBMCs.** APC, allophycocyanine; PE, phycoerythrin.

|                                | <b>Treated with Remdesivir</b> |                |
|--------------------------------|--------------------------------|----------------|
|                                | Pre-Treatment                  | Post-Treatment |
| P/F                            | 277 ± 98                       | 304.7 ± 95.1   |
| Venturi Mask Oxygen percentage | 0.35 ± 0.12                    | 0.31 ± 0.13    |
| Procalcitonin                  | 0.08 ± 0.06                    | 0.092 ± 0.088  |
| C-reactive protein             | 78.86 ± 47.9                   | 85.98 ± 78.95  |
| Interleukin (IL)-6 (pg/mL)     | 8.15 ± 5.3                     | <2.7± 0        |
| Fibrinogen                     | 584.9 ± 115.8                  | 412.2 ± 108.5  |
| D-Dimer                        | 2980 ± 7216.4                  | 384.1 ± 166.8  |
| Ferritin                       | 989.7 ± 456.8                  | 743.8 ± 503.9  |
| Alanine aminotransferase       | 41 ± 22.4                      | 68.3 ± 64.7    |
| Aspartate aminotransferase     | 34.2 ± 19.8                    | 139.6 ± 171.2  |
| Gamma glutamil transpeptidase  | 61.6 ± 79.8                    | 48 ± 31.6      |
| Alkaline phosphatase           | 61.8 ± 21.3                    | 55.6 ± 10      |
| Total bilirubin                | 0.55 ± 0.2                     | 0.43 ± 0.1     |
| Creatinine                     | 0.89 ± 0.15                    | 0.81 ± 0.1     |

**Supplementary Table S2. Clinical features of considered COVID-19 patients before and after Remdesivir (RDV) treatment. Abbreviations: P/F [arterial partial pressure of oxygen (PaO<sub>2</sub>)/fraction of inspired oxygen (FiO<sub>2</sub>)].**
